# Supplementary material for: Propionate Converting Anaerobic Microbial Communities Enriched from Distinct Biogeochemical Zones of Aarhus Bay, Denmark under Sulfidogenic and Methanogenic Conditions
Source: PubMed Central journal article supplement (PMC7143418; doi:10.3390/microorganisms8030394), 2020-03-11
Supplement: microorganisms-08-00394-s001.pdf [file microorganisms-08-00394-s001.pdf]

**Supplemental Information:**

**Table 1.** Overview of reactions examined in this study.  $\Delta G$  values were obtained from Thauer et al., 1977.

| No.                                                                | Equation                                                                                                                                                         | $\Delta G^\circ$ (kJ/reaction)* |
|--------------------------------------------------------------------|------------------------------------------------------------------------------------------------------------------------------------------------------------------|---------------------------------|
| <b>Acetogenic reactions</b>                                        |                                                                                                                                                                  |                                 |
| 1                                                                  | Propionate <sup>-</sup> + 3 H <sub>2</sub> O → Acetate <sup>-</sup> + HCO <sub>3</sub> <sup>-</sup> + 3 H <sub>2</sub> + H <sup>+</sup>                          | +76.1                           |
| <b>Sulfate-reducing reactions</b>                                  |                                                                                                                                                                  |                                 |
| 2                                                                  | Propionate <sup>-</sup> + 0.75 SO <sub>4</sub> <sup>2-</sup> → Acetate <sup>-</sup> + 0.75 HS <sup>-</sup> + HCO <sub>3</sub> <sup>-</sup> + 0.25 H <sup>+</sup> | -37.8                           |
| 3                                                                  | 4 H <sub>2</sub> + SO <sub>4</sub> <sup>2-</sup> + H <sup>+</sup> → HS <sup>-</sup> + 4 H <sub>2</sub> O                                                         | -151.9                          |
| 4                                                                  | Acetate <sup>-</sup> + SO <sub>4</sub> <sup>2-</sup> → 2 HCO <sub>3</sub> <sup>-</sup> + HS <sup>-</sup>                                                         | -47.6                           |
| <b>Methanogenic reactions</b>                                      |                                                                                                                                                                  |                                 |
| 5                                                                  | 4 H <sub>2</sub> + HCO <sub>3</sub> <sup>-</sup> + H <sup>+</sup> → CH <sub>4</sub> + 3 H <sub>2</sub> O                                                         | -135.6                          |
| 6                                                                  | Acetate <sup>-</sup> + H <sub>2</sub> O → CH <sub>4</sub> + HCO <sub>3</sub> <sup>-</sup>                                                                        | -31.0                           |
| <b>Syntrophic propionate conversion</b>                            |                                                                                                                                                                  |                                 |
| 1+5                                                                | Propionate <sup>-</sup> + 0.75 H <sub>2</sub> O → Acetate <sup>-</sup> + 0.75 CH <sub>4</sub> + 0.25 HCO <sub>3</sub> <sup>-</sup> + 0.25 H <sup>+</sup>         | -25.6                           |
| <b>Complete propionate conversion by SRB</b>                       |                                                                                                                                                                  |                                 |
| 2+4                                                                | Propionate <sup>-</sup> + 1.75 SO <sub>4</sub> <sup>2-</sup> → 1.75 HS <sup>-</sup> + 3 HCO <sub>3</sub> <sup>-</sup> + 0.25 H <sup>+</sup>                      | -85.4                           |
| <b>Complete propionate conversion by syntrophs and methanogens</b> |                                                                                                                                                                  |                                 |
| 1+5+6                                                              | Propionate <sup>-</sup> + 1.75 H <sub>2</sub> O → 1.75 CH <sub>4</sub> + 1.25 HCO <sub>3</sub> <sup>-</sup> + 0.25 H <sup>+</sup>                                | -56.6                           |

**Table S2.** Overview of all enrichment slurries fed with propionate and the total amounts of the reactants consumed and products formed during the enrichment period. The enrichment slurries consisted of sediment from either the sulfate zone (SZ), sulfate-methane transition zone (SMTZ) or methane zone (MZ) and were incubated at 25°C or 10°C, with 3 mM, 20 mM or without (-) sulfate amendments along the study. The slurries P1/P2, P3/P4, P5/P6, P7/P8 from each sediment zone are biological replicates. Slurries with \* are presented in the propionate conversion graphs and used for molecular analysis.

| Origin | Slurry code | Treatment                           | Incubation temperature (°C) | Reactants (µmol/slurry) |         | Products (µmol/slurry) |         |         |
|--------|-------------|-------------------------------------|-----------------------------|-------------------------|---------|------------------------|---------|---------|
|        |             |                                     |                             | Propionate              | Sulfate | Acetate                | Sulfide | Methane |
| SZ     | *SZP1       | -                                   | 25                          | 26157                   | 336     | 17905                  | 881     | 37464   |
|        | SZP2        | -                                   | 25                          | 2726                    | 159     | 1183                   | 284     | 0       |
|        | SZP3        | 20 mM SO <sub>4</sub> <sup>2-</sup> | 25                          | 20623                   | 29592   | 19126                  | 29062   | 33      |
|        | *SZP4       | 20 mM SO <sub>4</sub> <sup>2-</sup> | 25                          | 26681                   | 42456   | 25677                  | 39089   | 1038    |
|        | SZP5        | -                                   | 10                          | 17190                   | 354     | 13170                  | 151     | 9083    |
|        | *SZP6       | -                                   | 10                          | 18414                   | 125     | 9558                   | 207     | 14959   |
|        | SZP7        | 20 mM SO <sub>4</sub> <sup>2-</sup> | 10                          | 15491                   | 13410   | 18442                  | 18296   | 0       |
|        | *SZP8       | 20 mM SO <sub>4</sub> <sup>2-</sup> | 10                          | 17679                   | 18592   | 21716                  | 21495   | 0       |
| SMTZ   | SMTZP1      | 3 mM SO <sub>4</sub> <sup>2-</sup>  | 25                          | 27494                   | 9343    | 25160                  | 6993    | 29829   |
|        | *SMTZP2     | 3 mM SO <sub>4</sub> <sup>2-</sup>  | 25                          | 32207                   | 9330    | 34093                  | 8892    | 15509   |
|        | *SMTZP3     | 20 mM SO <sub>4</sub> <sup>2-</sup> | 25                          | 27819                   | 37381   | 9246                   | 34439   | 339     |
|        | SMTZP4      | 20 mM SO <sub>4</sub> <sup>2-</sup> | 25                          | 28694                   | 40125   | 11250                  | 35587   | 74      |
|        | *SMTZP5     | 3 mM SO <sub>4</sub> <sup>2-</sup>  | 10                          | 18465                   | 6638    | 16996                  | 7316    | 2797    |
|        | SMTZP6      | 3 mM SO <sub>4</sub> <sup>2-</sup>  | 10                          | 17365                   | 6839    | 17427                  | 7642    | 2197    |
|        | *SMTZP7     | 20 mM SO <sub>4</sub> <sup>2-</sup> | 10                          | 26008                   | 33660   | 27709                  | 34299   | 17      |
|        | SMTZP8      | 20 mM SO <sub>4</sub> <sup>2-</sup> | 10                          | 27162                   | 35346   | 26523                  | 36833   | 34      |
| MZ     | *MZP1       | -                                   | 10                          | 7204                    | 932     | 7346                   | 552     | 3909    |
|        | MZP2        | -                                   | 10                          | 3897                    | 809     | 1575                   | 673     | 926     |
|        | *MZP3       | -                                   | 25                          | 27472                   | 825     | 13791                  | 563     | 38473   |
|        | MZP4        | -                                   | 25                          | 34576                   | 604     | 20771                  | 509     | 43969   |
|        | MZP5        | 20 mM SO <sub>4</sub> <sup>2-</sup> | 25                          | 39414                   | 33244   | 30817                  | 32821   | 1670    |
|        | *MZP6       | 20 mM SO <sub>4</sub> <sup>2-</sup> | 25                          | 49211                   | 45738   | 49783                  | 40572   | 418     |
|        | MZP7        | 20 mM SO <sub>4</sub> <sup>2-</sup> | 10                          | 16577                   | 20444   | 15542                  | 15184   | 0       |
|        | *MZP8       | 20 mM SO <sub>4</sub> <sup>2-</sup> | 10                          | 11366                   | 16233   | 11913                  | 12356   | 0       |

**Table S3.** The number of reads per sample generated by Pyrosequencing for Bacteria and HiSeq Illumina sequencing for Archaea. ENV: Environmental sample.

| Origin                          | Slurry code | Bacterial reads | Archaeal reads |
|---------------------------------|-------------|-----------------|----------------|
| Sulfate zone                    | ENV         | 8733            | 9120           |
|                                 | SZP1        | 9903            | 13481          |
|                                 | SZP4        | 12305           | 74345          |
|                                 | SZP6        | 27196           | 67941          |
|                                 | SZP8        | 15062           | 16472          |
| Sulfate-methane transition zone | ENV         | 3186            | 18696          |
|                                 | SMTZP2      | 8730            | 33641          |
|                                 | SMTZP3      | 5653            | 30858          |
|                                 | SMTZP5      | 5949            | 79958          |
|                                 | SMTZP7      | 3934            | 21631          |
| Methane zone                    | ENV         | 10824           | 30848          |
|                                 | MZP1        | 14192           | 78094          |
|                                 | MZP3        | 14752           | 108810         |
|                                 | MZP6        | 14171           | 25156          |
|                                 | MZP8        | 1888            | 5547           |

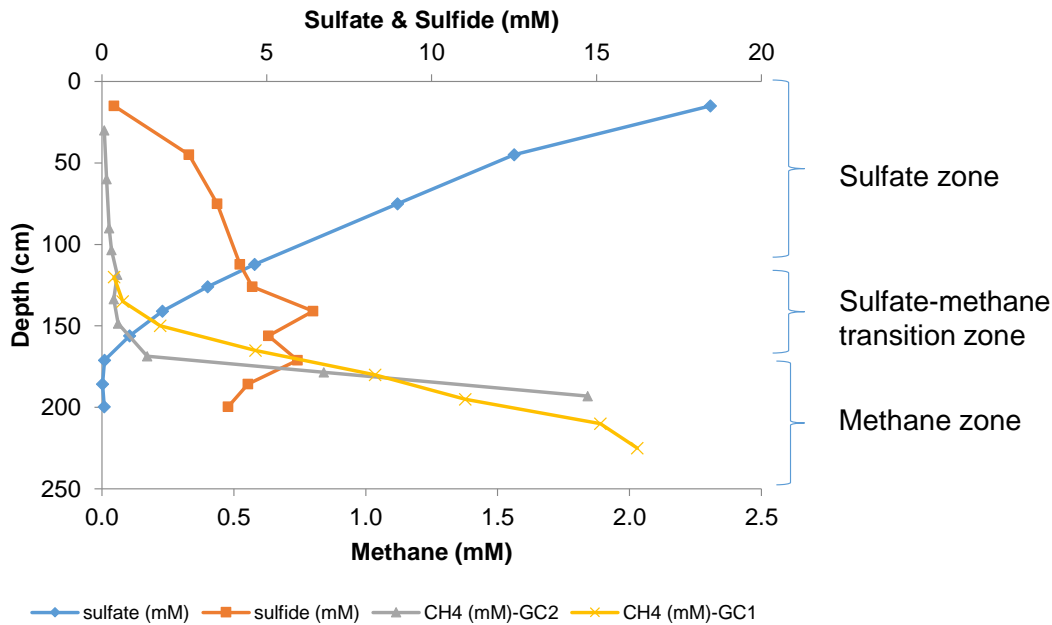

**Figure S1.** Depth profiles of sediment pore water sulfate, sulfide and methane for Station M1, in Aarhus Bay, Denmark. Methane-GC1 and Methane-GC2 stands for methane concentrations retrieved from two different gravity corers, gravity corer 1 and 2, respectively. SZ; Sulfate zone, SMTZ; sulfate-methane transition zone; MZ, methane zone.

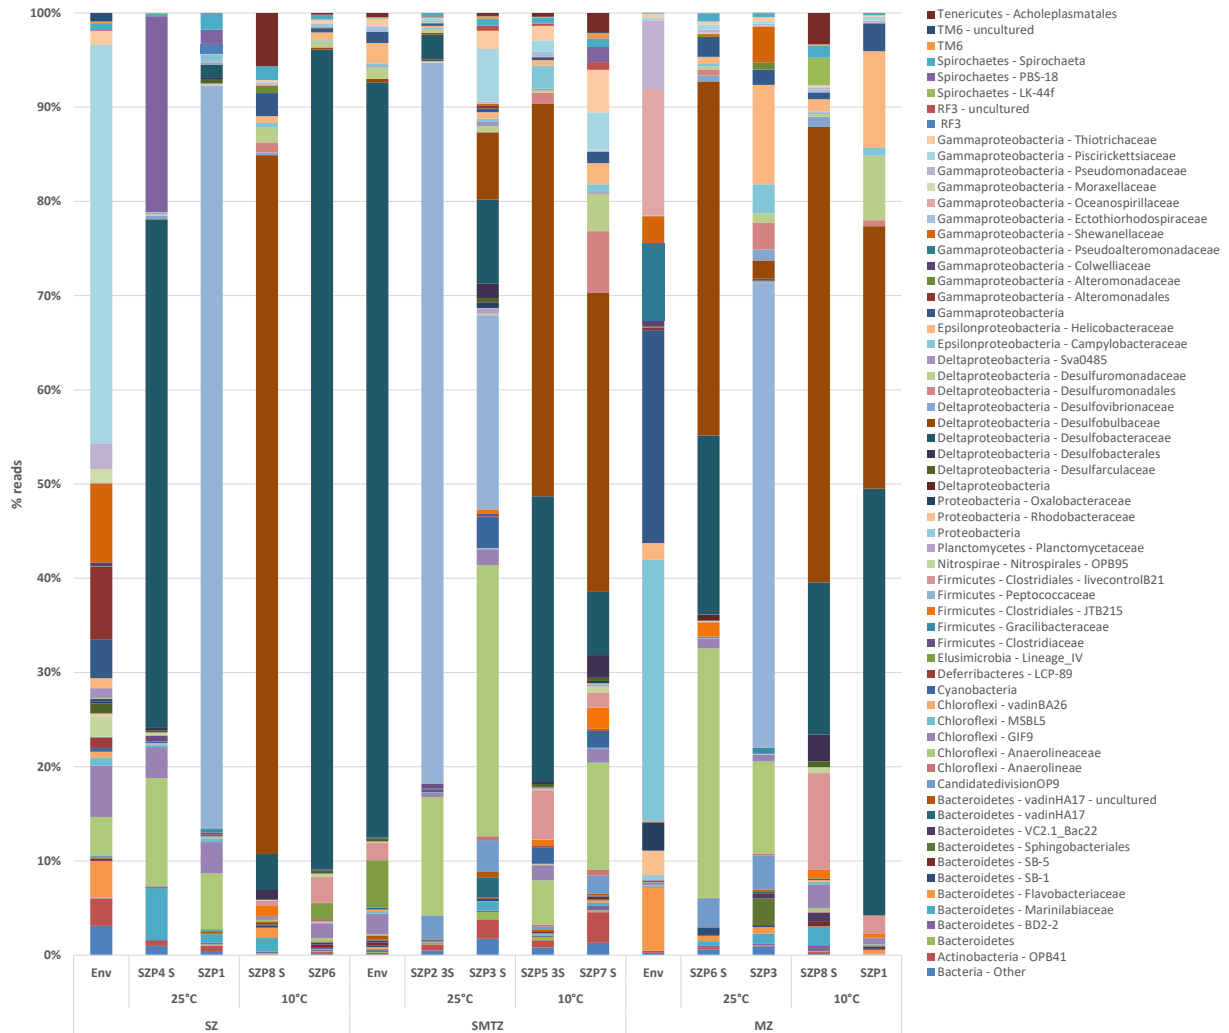

**Figure S2.** Relative abundance of the bacterial community in all slurries and environmental samples at family level, normalized to 100%. Only those families that were present at an abundance >1% in at least one sample were included in the graph. SZ: Sulfate zone, SMTZ: Sulfate-methane transition zone; MZ: Methane zone. Env: Sediment sample belonging to the indicated biogeochemical zone. S: 20mM sulfate, 3S: 3mM sulfate is used as electron acceptor in slurries. Slurries that were not labeled with 'S' or '3S' were incubated without sulfate.

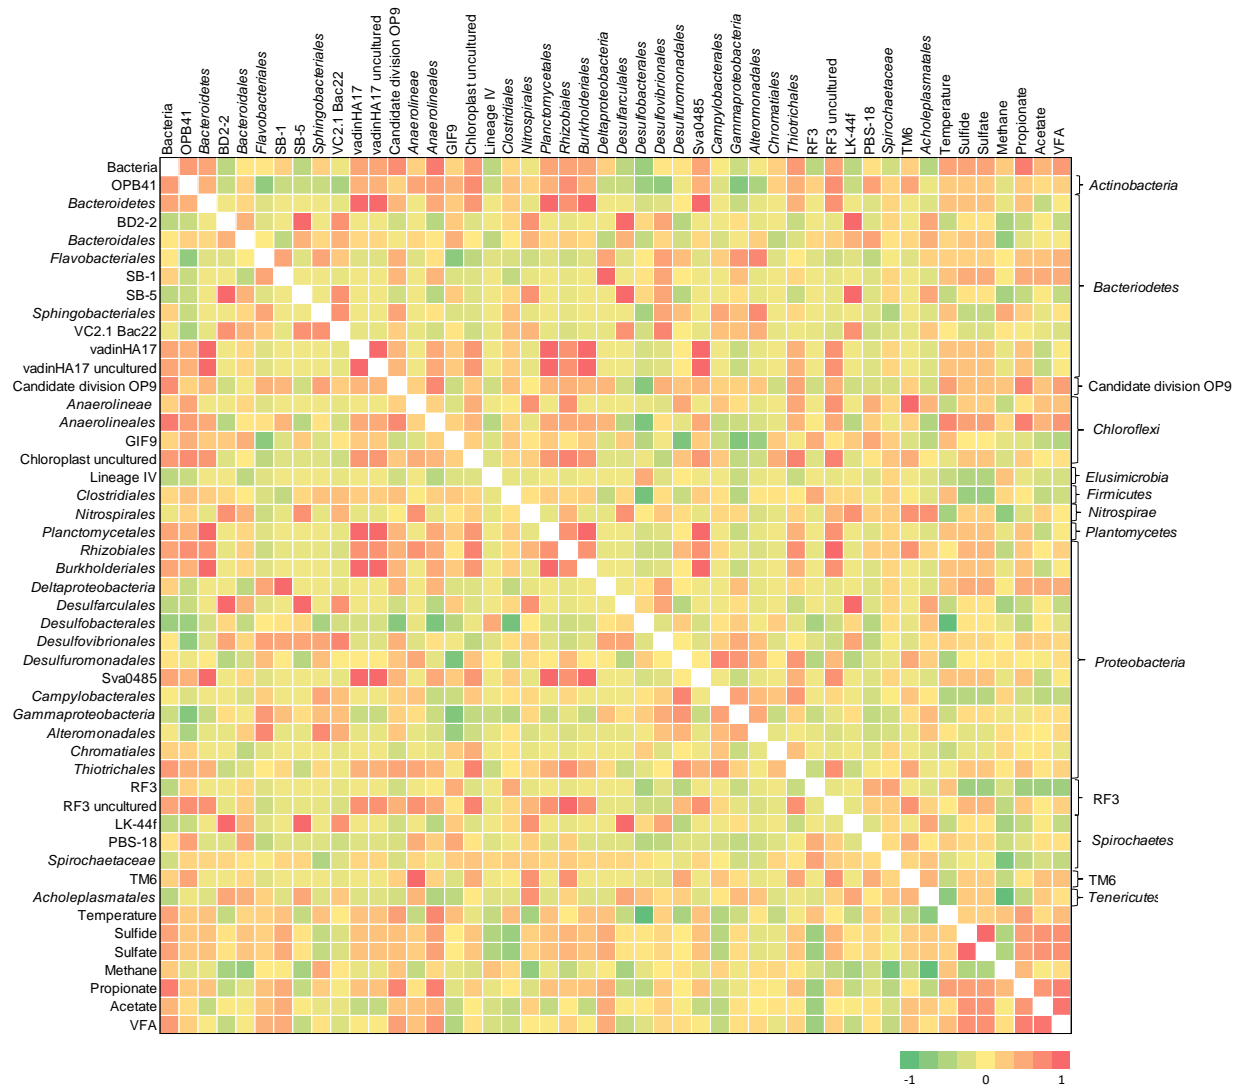

**Figure S3.** Heatmap depicting the correlation between bacterial orders present at a relative abundance >1% of total reads across the 12 slurry samples analyzed and experimental parameters. Correlations were determined by means of the two tailed Spearman's Rank Order Correlation test. The heatmap colors shifted towards red indicate strong correlation.

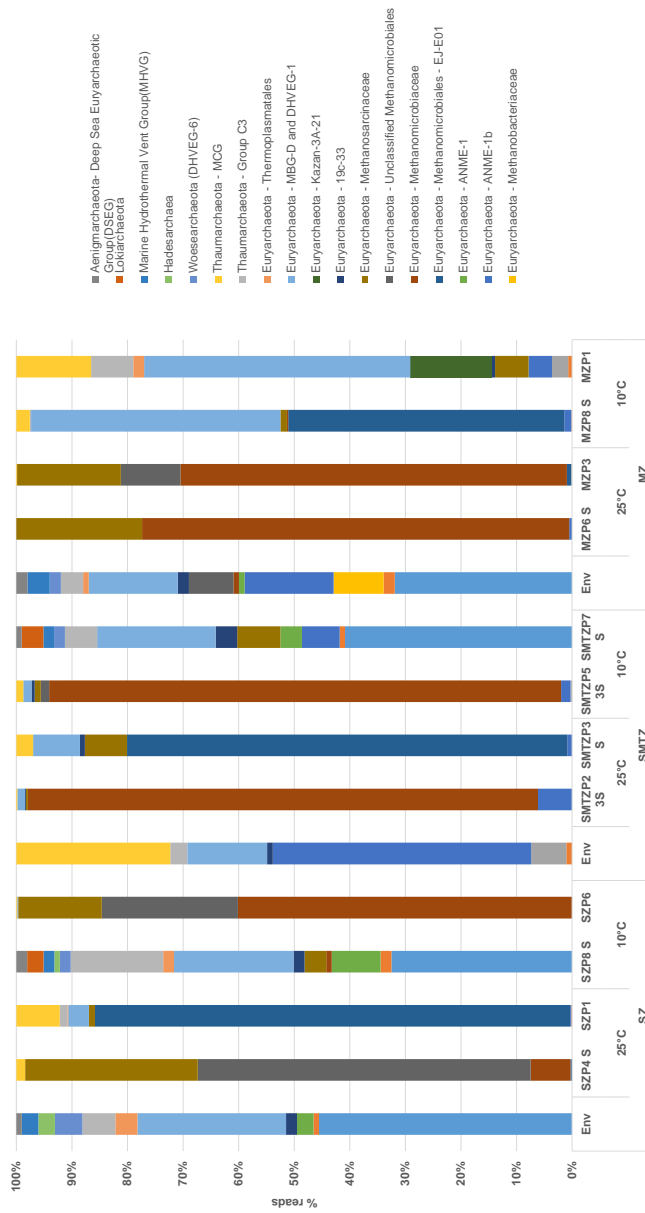

**Figure S4.** Relative abundances of the archaeal community in all slurries and environmental samples at family level, normalized to 100%. Only those families that were present at an abundance >1% in at least one sample were included in the graph. SZ: Sulfate zone, SMTZ: Sulfate-methane transition zone; MZ: Methane zone. Env: Sediment sample belonging to the indicated biogeochemical zone. S: 20mM sulfate, 3S: 3mM sulfate is used as electron acceptor in slurries. Slurries that were not labeled with 'S' or '3S' were incubated without sulfate.

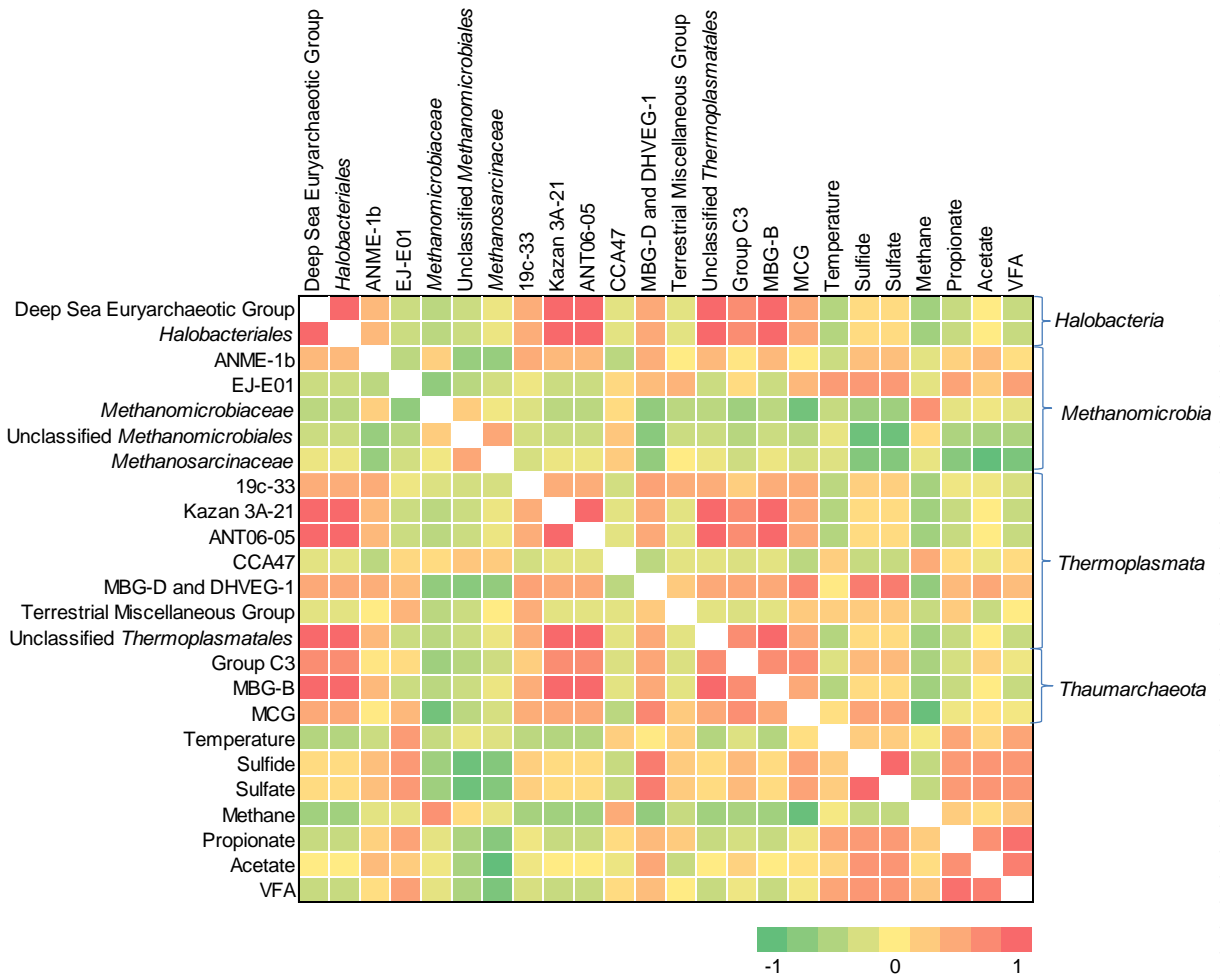

**Figure S5.** Heatmap depicting the correlation between archaeal families present at a relative abundance >1% of total reads across the 12 slurry samples analyzed and experimental parameters. Correlations were determined by means of the two tailed Spearman's Rank Order Correlation test. The heatmap colors shifted towards red indicate strong correlation.
